# Supplementary material for: Chemically integrated hierarchical hybrid zinc cobaltate/reduced graphene oxide microspheres as an enhanced lithium-ion battery anode
Source: Royal Society of Chemistry journal article supplement (doi:10.1039/c5ra21992b), 2016-01-01
Supplement: c5ra21992b1.pdf [file c5ra21992b1.pdf]

### Electronic Supplementary Information

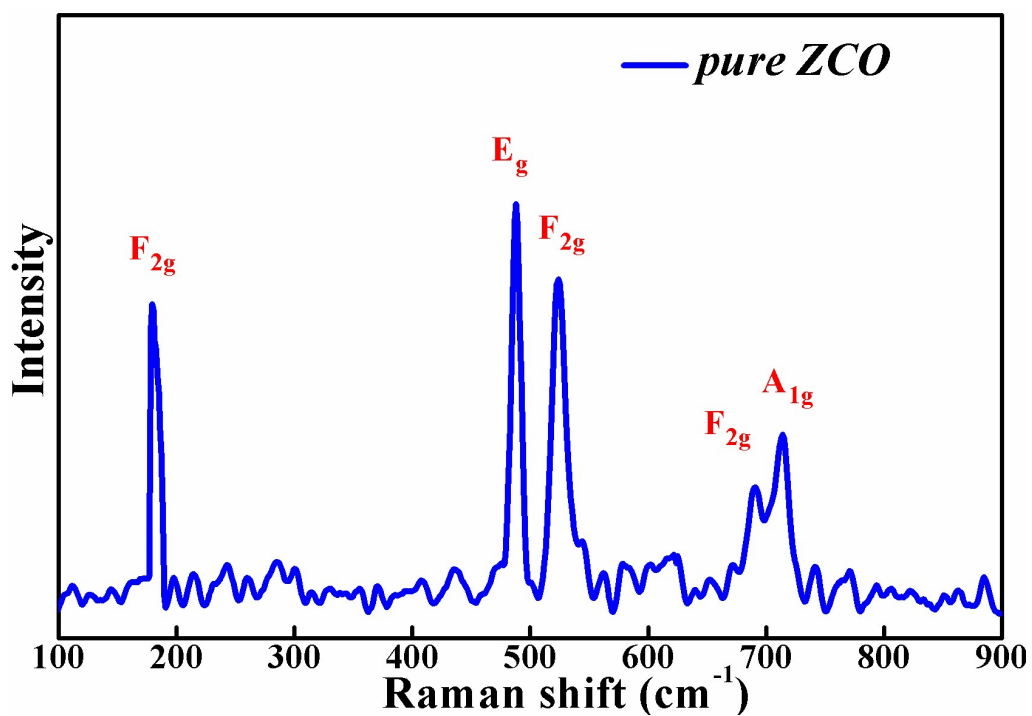

Fig. 1 Raman spectrum of pure ZCO materials.

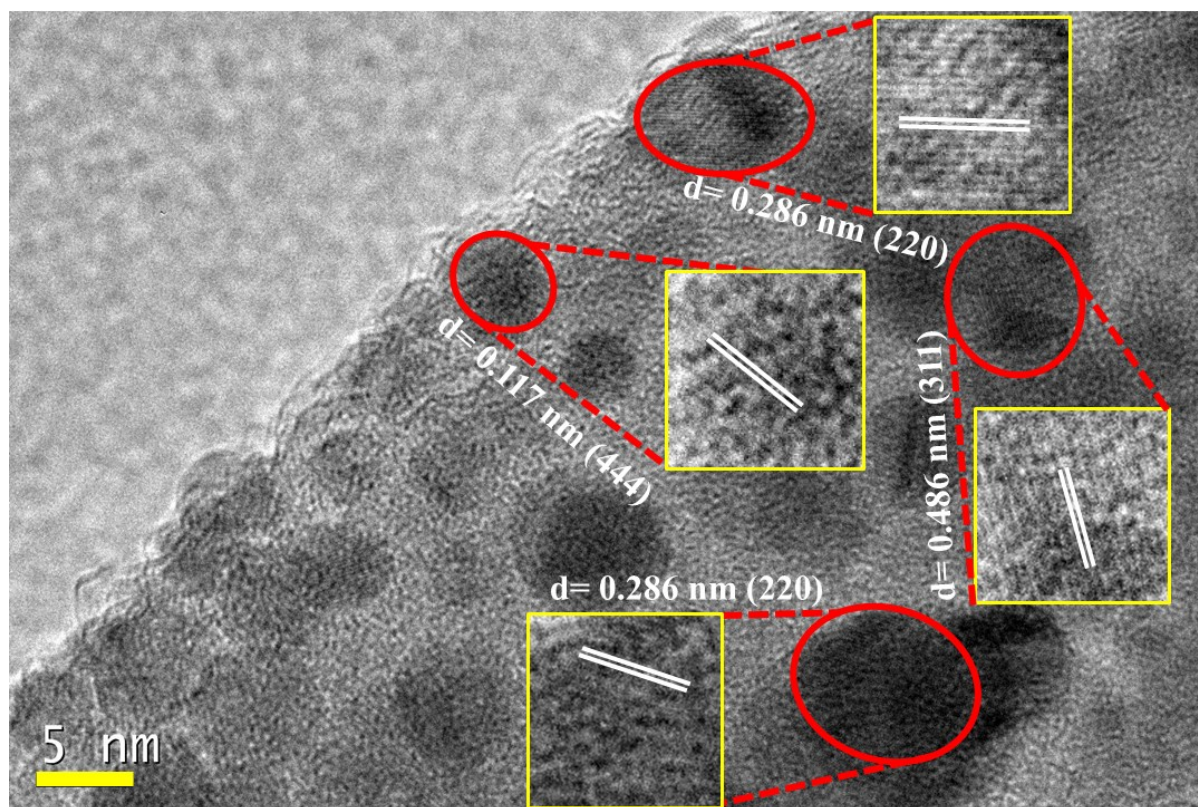

Fig. 2 High resolution TEM images of ZCO/rGO hybrid composites..
